# Supplementary material for: Withaninsams A and B: Phenylpropanoid Esters from the Roots of Indian Ginseng (Withania somnifera)
Source: Plants (Basel). 2019 Nov 20;8(12):527. doi: 10.3390/plants8120527 (PMC6963882; doi:10.3390/plants8120527)
Supplement: Supplementary file 1 [file plants-08-00527-s001.pdf]

## Supplementary Materials

### Supporting Information Contents:

|                                                                                                                             |    |
|-----------------------------------------------------------------------------------------------------------------------------|----|
| <b>General experimental procedures</b> .....                                                                                | S3 |
| <b>Figure S1.</b> The HRESIMS data of compounds <b>1</b> and <b>2</b> .....                                                 | S4 |
| <b>Figure S2.</b> The $^1\text{H}$ NMR spectrum of compounds <b>1</b> and <b>2</b> ( $\text{CD}_3\text{OD}$ , 800 MHz)..... | S5 |
| <b>Figure S3.</b> The $^1\text{H}$ - $^1\text{H}$ COSY spectrum of compounds <b>1</b> and <b>2</b> .....                    | S6 |
| <b>Figure S4.</b> The HSQC spectrum of compounds <b>1</b> and <b>2</b> .....                                                | S7 |
| <b>Figure S5.</b> The HMBC spectrum of compounds <b>1</b> and <b>2</b> .....                                                | S8 |

## General experimental procedures

Optical rotations were measured using a JASCO P-2000 polarimeter (JASCO, Easton, MD, USA). Ultraviolet spectra were acquired on an Agilent 8453 UV–visible spectrophotometer (Agilent Technologies, Santa Clara, CA, USA). Infrared spectra were recorded with a Bruker IFS-66/S FT-IR spectrometer (Bruker, Karlsruhe, Germany). NMR spectra were recorded with a Bruker AVANCE III HD 800 NMR spectrometer with a 5 mm TCI CryoProbe operating at 800 MHz ( $^1\text{H}$ ) and 200 MHz ( $^{13}\text{C}$ ), with chemical shifts given in ppm ( $\delta$ ) for  $^1\text{H}$  and  $^{13}\text{C}$  NMR analyses. All HRESIMS data were obtained with a Waters Xevo G2 QTOF mass spectrometer and Synapt G2 HDMS quadrupole time-of-flight (TOF) mass spectrometer (Waters). Preparative high-performance liquid chromatography (HPLC) was performed using a Waters 1525 Binary HPLC pump with a Waters 996 photodiode array detector (Waters Corporation, Milford, MA, USA) and an Agilent Eclipse C<sub>18</sub> column (250 × 21.2 mm, 5  $\mu\text{m}$ ; flow rate: 5 mL/min; Agilent Technologies). Semipreparative HPLC was performed using a Shimadzu Prominence HPLC System with SPD-20A/20AV Series Prominence HPLC UV–vis detectors (Shimadzu, Tokyo, Japan) and a Phenomenex Luna C<sub>18</sub> column (250 × 10 mm, 5  $\mu\text{m}$ ; flow rate: 2 mL/min; Phenomenex, Torrance, CA, USA). LC/MS analysis was performed on an Agilent 1200 Series HPLC system equipped with a diode array detector and 6130 Series ESI mass spectrometer using an analytical Kinetex C<sub>18</sub> 100 Å column (100 × 2.1 mm, 5  $\mu\text{m}$ ; flow rate: 0.3 mL/min; Phenomenex). Silica gel 60 (230–400 mesh, Merck, Darmstadt, Germany) and RP-C<sub>18</sub> silica gel (Merck, 230–400 mesh) were used for column chromatography. The packing material for molecular sieve column chromatography was Sephadex LH-20 (Pharmacia, Uppsala, Sweden). Thin-layer chromatography (TLC) was performed with precoated silica gel F254 plates and RP-C<sub>18</sub> F254s plates (Merck), and spots were detected under UV light or by heating after spraying with anisaldehyde-sulfuric acid.

**Single Mass Analysis**

Tolerance = 5.0 mDa / DBE: min = -1.5, max = 50.0

Element prediction: Off

Number of isotope peaks used for i-FIT = 3

Monoisotopic Mass, Even Electron Ions

107 formula(e) evaluated with 3 results within limits (up to 50 closest results for each mass)

Elements Used:

| Mass     | Calc. Mass | mDa  | PPM  | DBE  | Formula       | i-FIT | i-FIT Norm | Fit Conf % | C  | H  | O | Na |
|----------|------------|------|------|------|---------------|-------|------------|------------|----|----|---|----|
| 317.1375 | 317.1365   | 1.0  | 3.2  | 5.5  | C16 H22 O5 Na | 292.8 | 0.456      | 63.39      | 16 | 22 | 5 | 1  |
|          | 317.1389   | -1.4 | -4.4 | 8.5  | C18 H21 O5    | 293.5 | 1.140      | 31.99      | 18 | 21 | 5 |    |
|          | 317.1330   | 4.5  | 14.2 | 17.5 | C25 H17       | 295.4 | 3.074      | 4.63       | 25 | 17 |   |    |

IIH4\_repositive

IIH4\_repositive 565 (5.248)

1: TOF MS ES+  
1.93e+003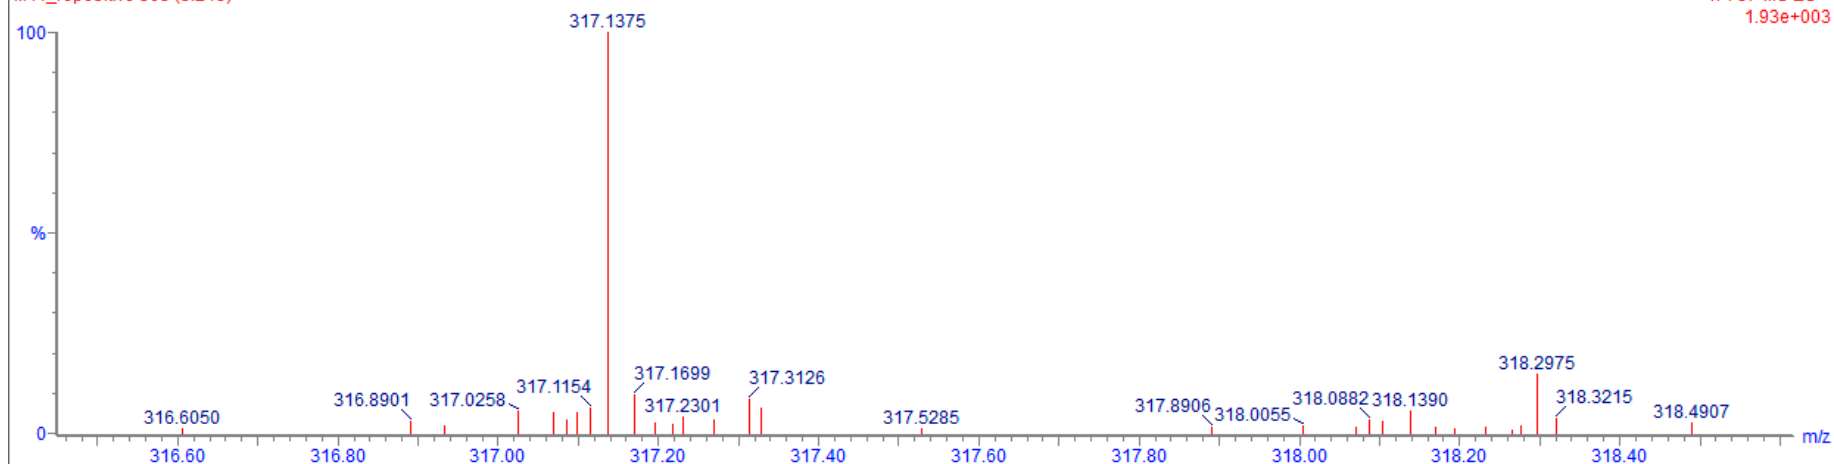**Figure S1.** The HRESIMS data of compounds 1 and 2.

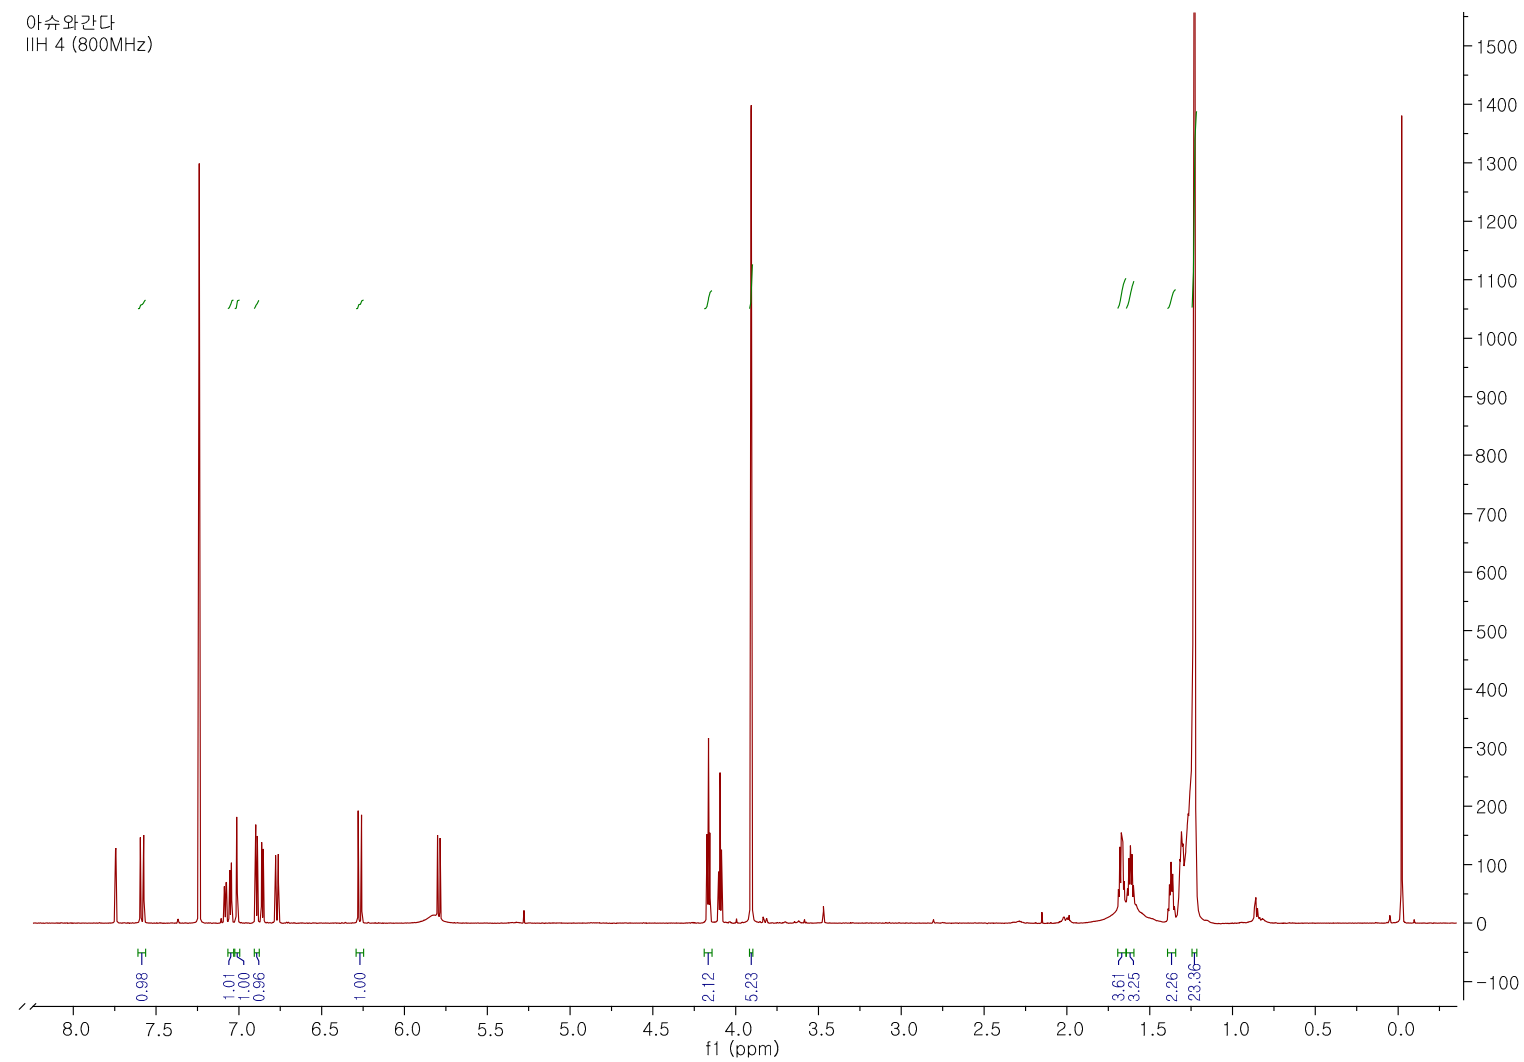

**Figure S2.** The  $^1\text{H}$  NMR spectrum of compounds **1** and **2** ( $\text{CD}_3\text{OD}$ , 800 MHz).

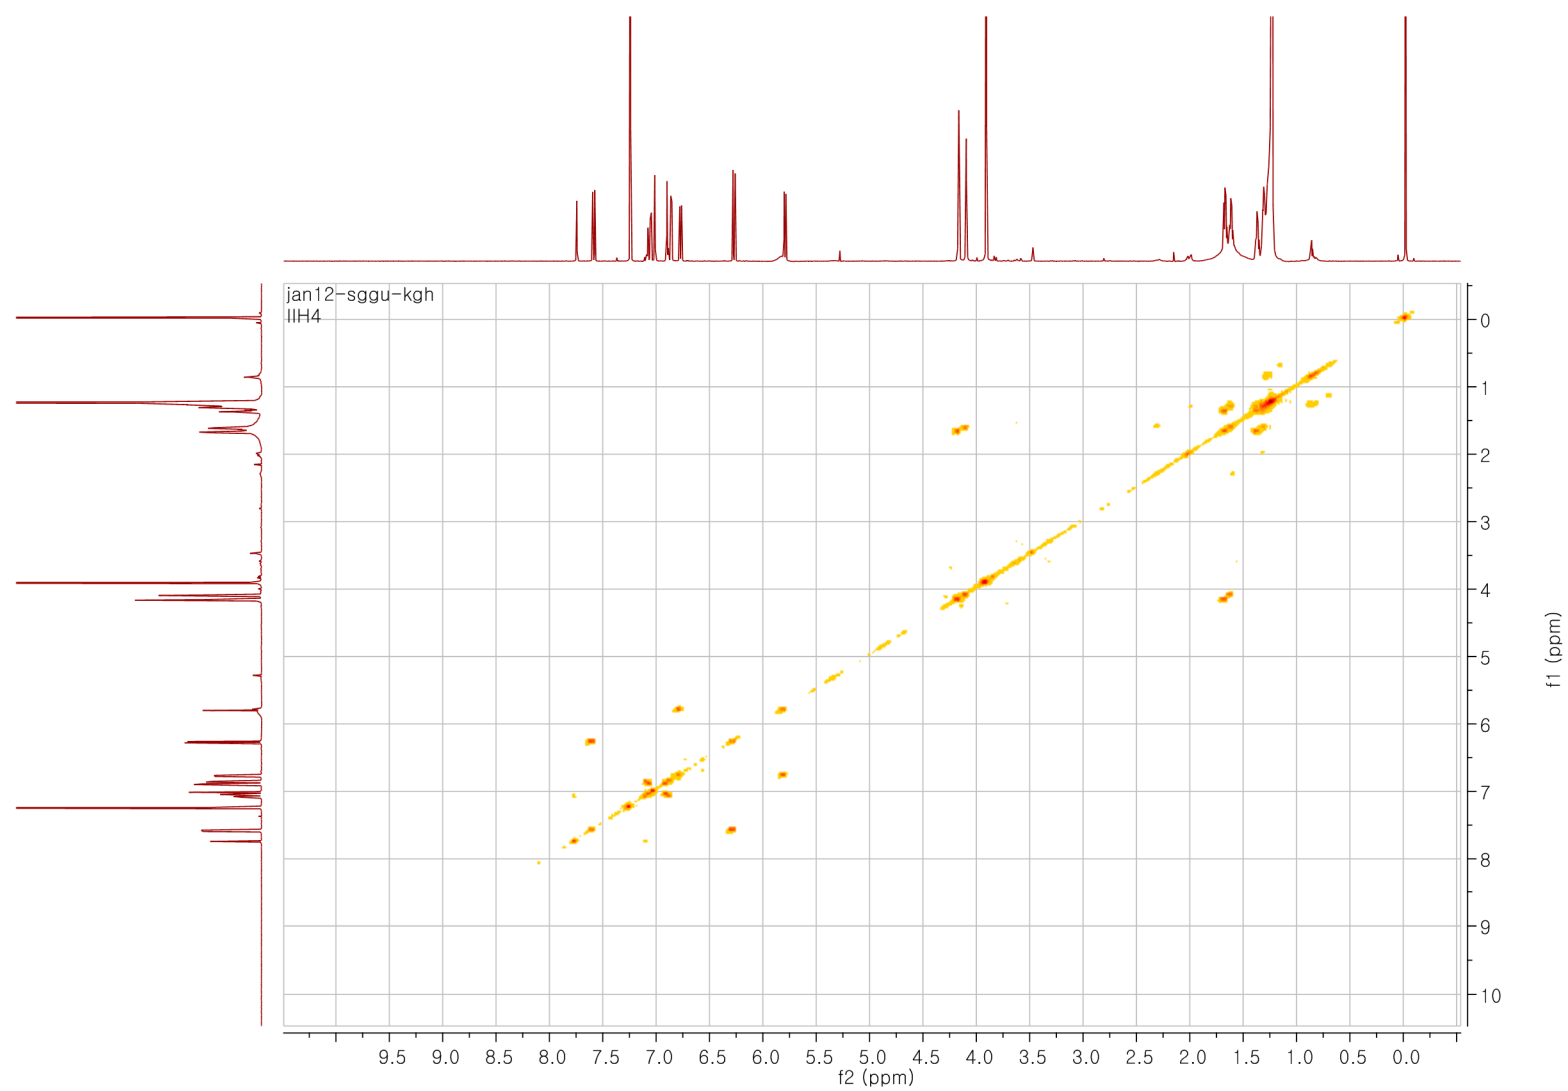

**Figure S3.** The  $^1\text{H}$ - $^1\text{H}$  COSY spectrum of compounds **1** and **2**.

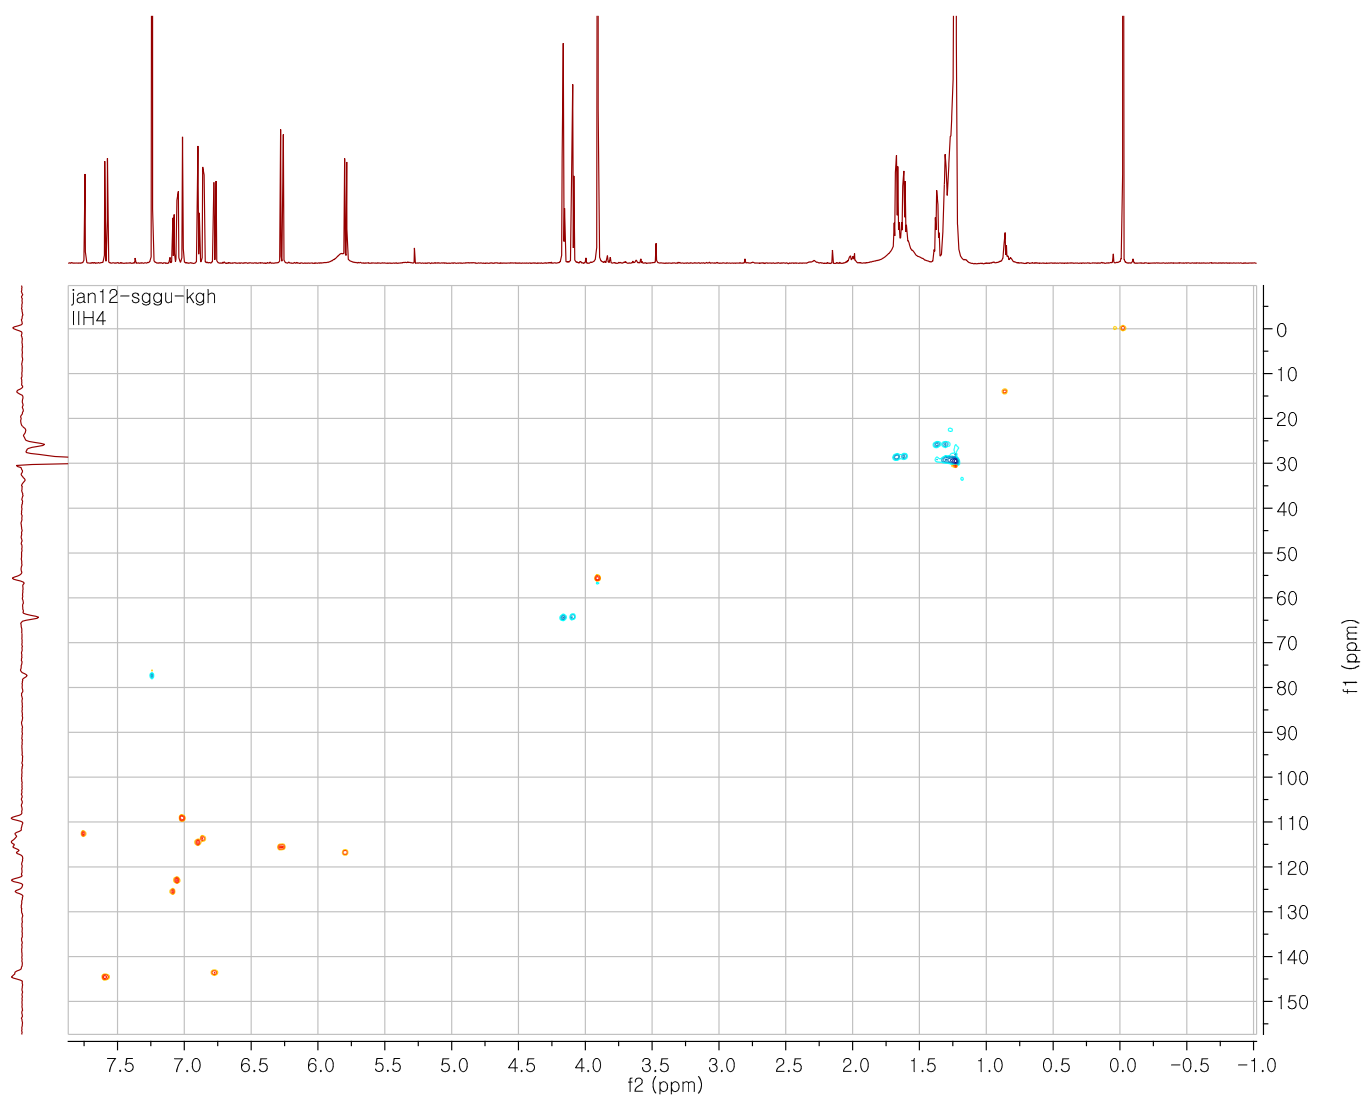

**Figure S4.** The HSQC spectrum of compounds **1** and **2**.

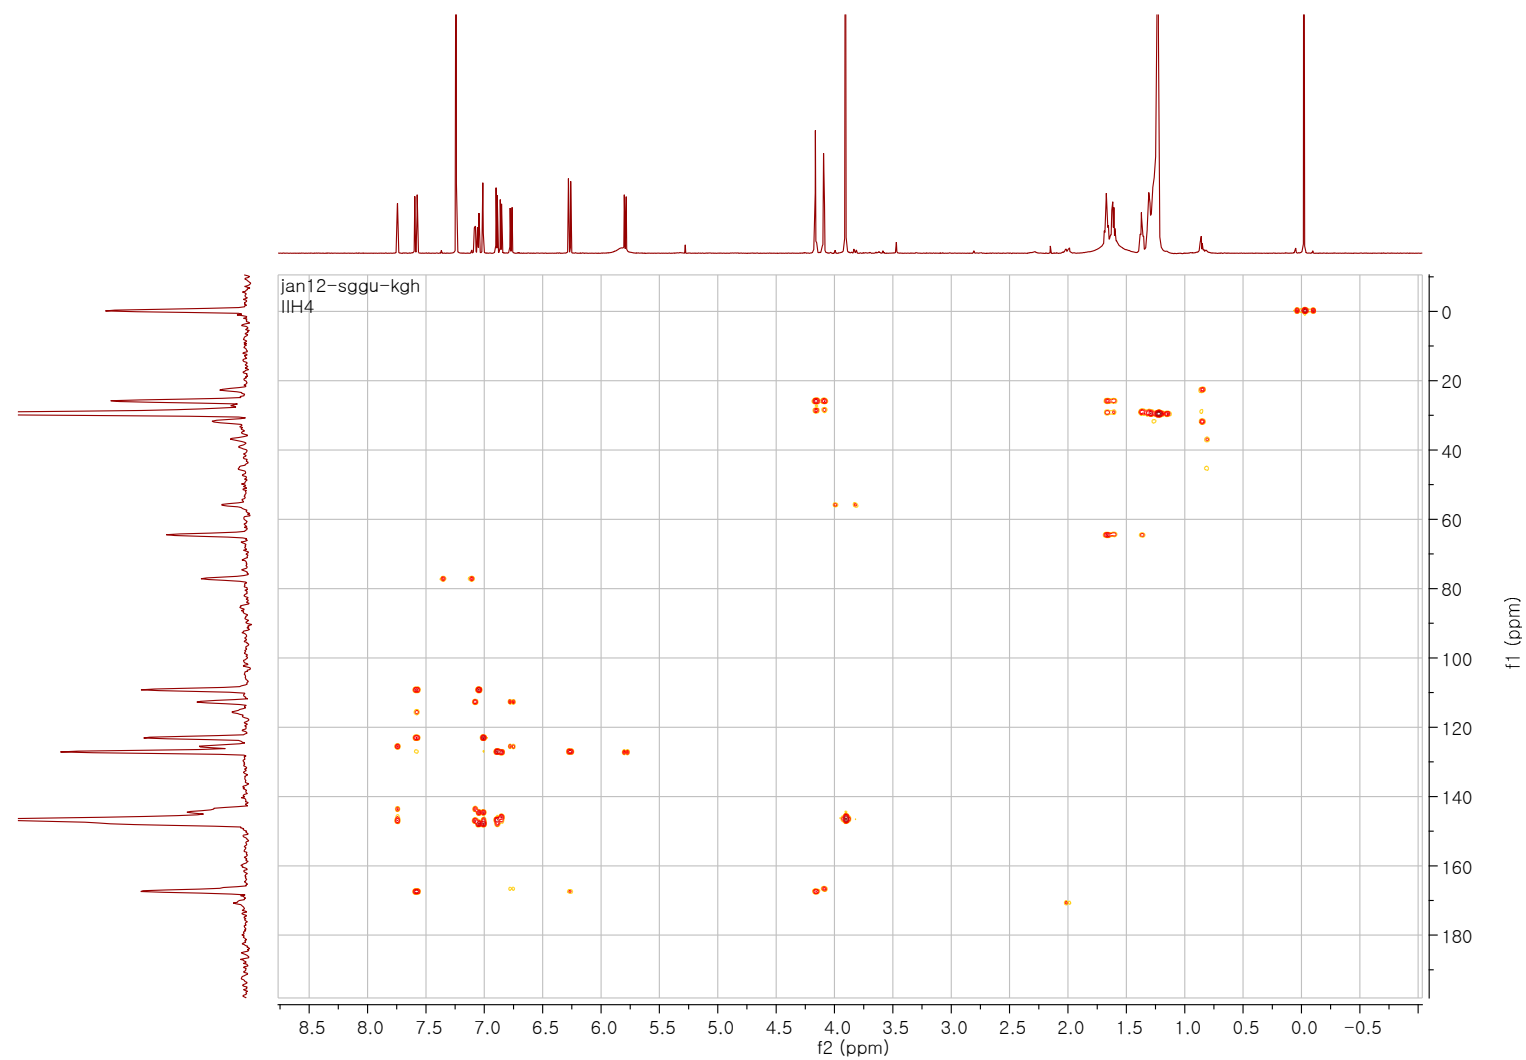

Figure S5. The HMBC spectrum of compounds 1 and 2.
